# Supplementary material
Source: MDPI journal article supplement (https://www.mdpi.com/2073-445X/6/3/59)
Supplement: s1 [file s1]

このアンケート調査では、非公式緑地についてお尋ねします。  
ご協力をお願いいたします。

そもそも非公式緑地とは何か？

非公式緑地とは、人間が手を加えた場所に自然に植物が育っている空間のことです。  
非公式緑地には多様な形があります。  
例えば、空き地、草刈り後に野草や雑草が育った道の端、草木が生い茂った壁と塀、線路、工場跡地、荒地、送電線周辺、川原・水辺等があげられます。  
非公式緑地は、庭・公園・自然保護区等とは違い、所有者や自治体から公式に認められていません。  
また、レクリエーション・遊び・農業等のためにの整備もされていません。  
しかしながら、その空間本来の機能が保つために整備される場合もあります（例えば、空き地や道の端で草刈りが行われる等）。  
以下に、様々な種類の非公式緑地の写真がありますので、アンケートにご回答される前に必ずご参照ください。

参加への同意方法・プライバシーの保護について

本アンケート調査は完全に任意です。  
本アンケートは、回答中にいつでも中断・中止することができ、どの質問に対しても、答えることを拒否する自由があります。  
無記名でご回答いただく調査のため、個人が特定されることはありません。  
アンケートにお答えいただくことをもって、調査協力にご承諾いただいたことといたします。

調査結果の公表について

調査結果を知りたい方は2017年6月までに調査担当者、総合地球環境学研究所の研究員クリストフ・ルブレヒト（crupprecht@chikyu.ac.jp）までメールにてご連絡ください。  
結果は2018年度まで研究学術誌に発表する予定です。

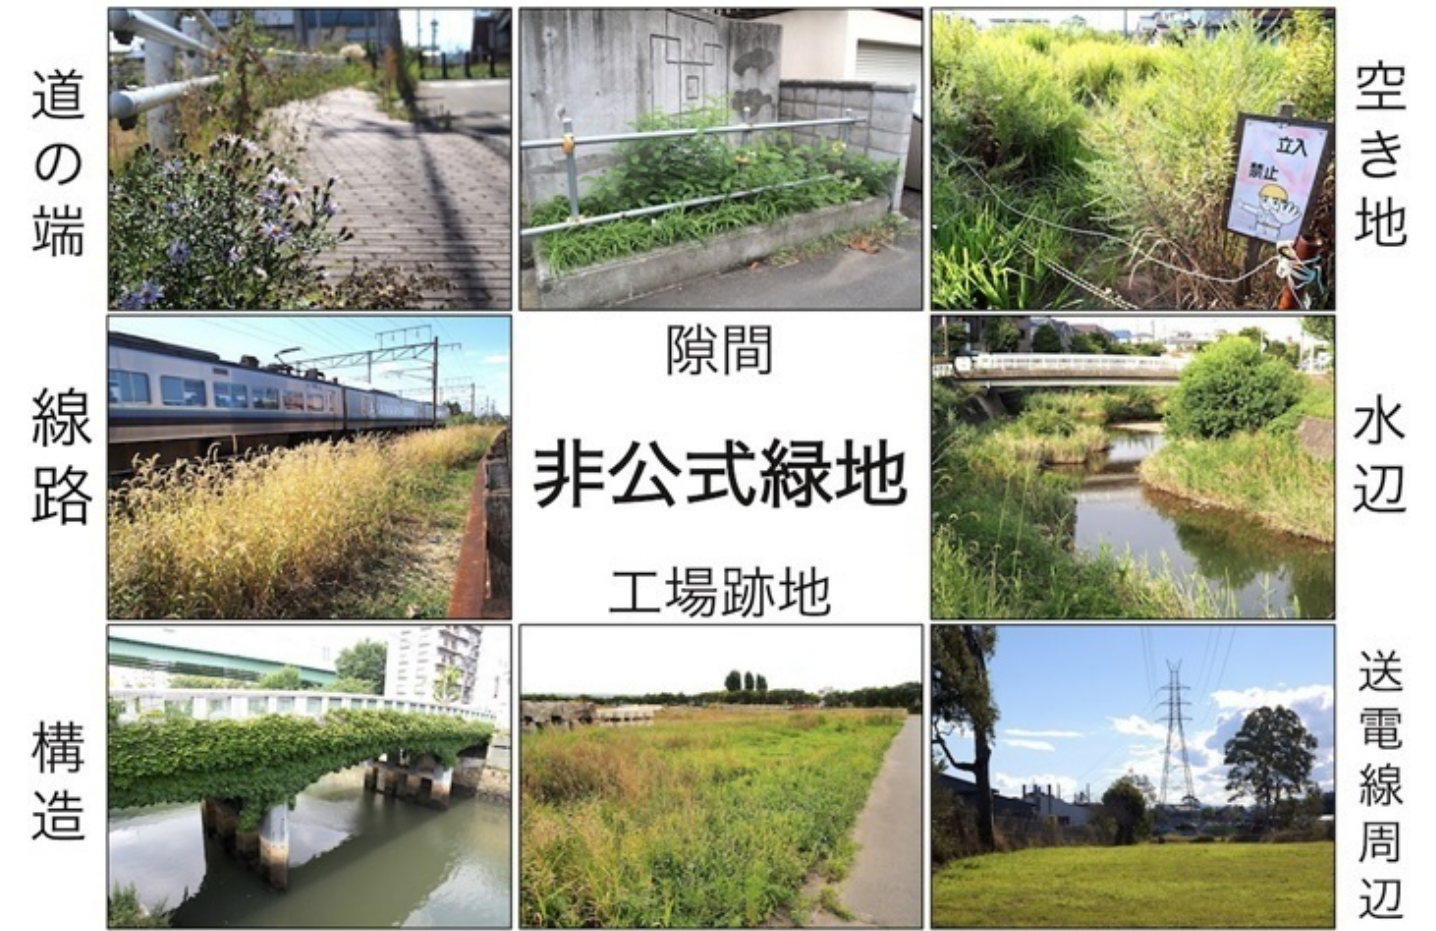

次へ

改ページ

**Q1 必須** 先に紹介したような非公式緑地はあなたのご近所にどのぐらいありますか。

- ☐ 1.ない
- ☐ 2.少し（1～5ヶ所）
- ☐ 3.いくつか（5～10ヶ所）
- ☐ 4.多数（10以上ヶ所）

次へ

改ページ



質問表示条件

条件式

(Q1 or 2,3,4)

Q2

必須

近所にどのような非公式緑地の種類があるかご存知ですか。  
公園・庭・広場等以外で、植物が生えている空間のみにチェックしてください。  
(いくつでも)

- ☐ 1.空地
- ☐ 2.構造物（植物が生い茂った壁・塀・屋根等）
- ☐ 3.線路
- ☐ 4.道の端
- ☐ 5.工場跡地
- ☐ 6.水辺（川岸・川原等）
- ☐ 7.送電線周辺
- ☐ 8.隙間（塀や壁の間等）

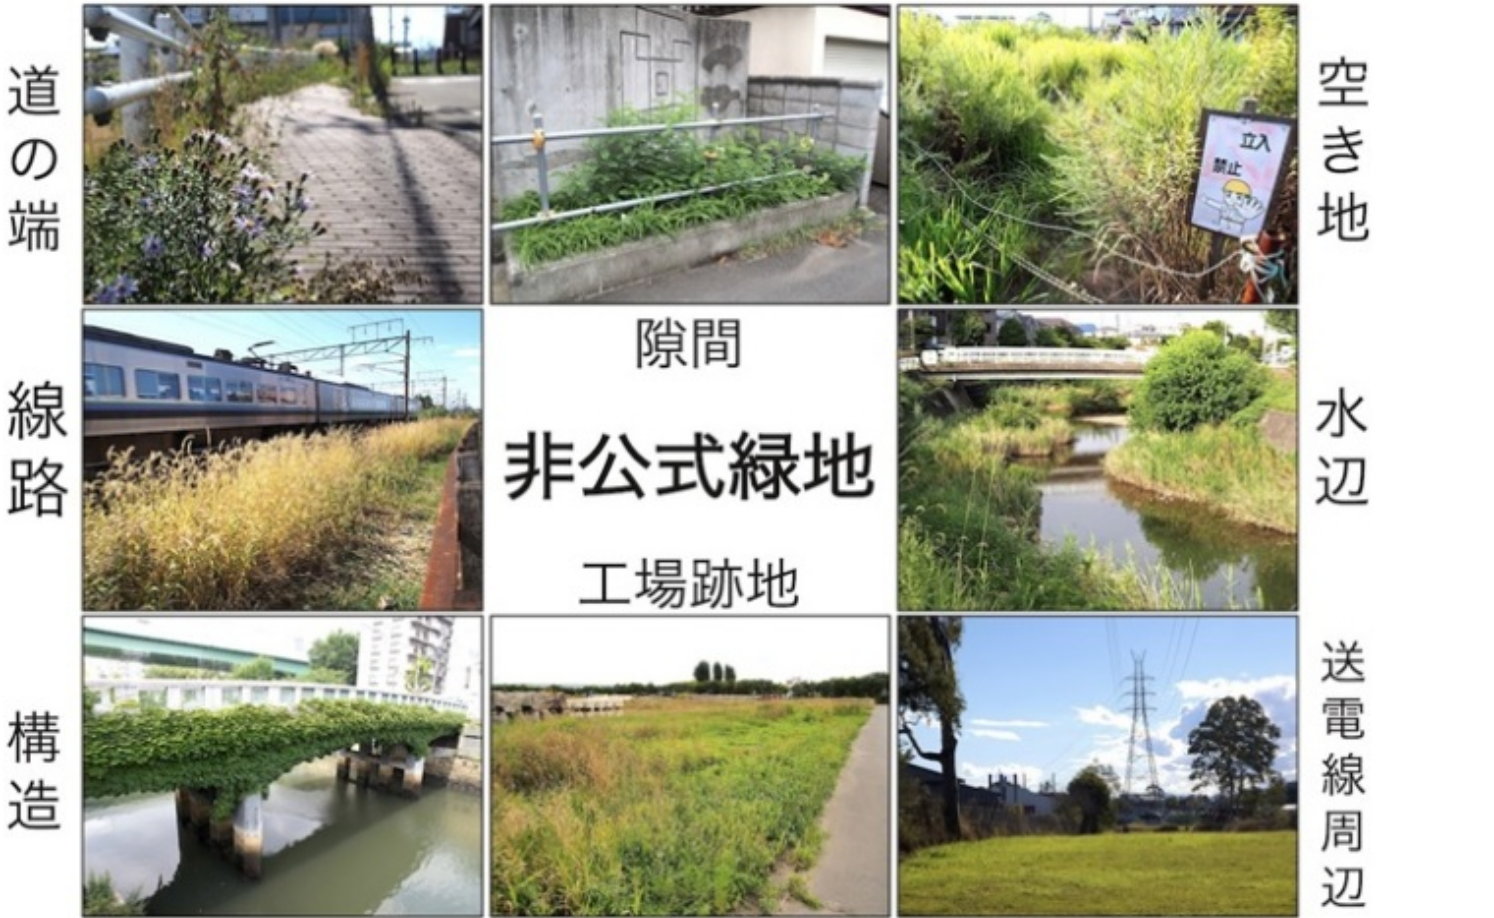

質問表示条件

条件式

(Q1 or 2,3,4)

Q4

必須

あなたは、どのぐらいの頻度で非公式緑地をレクリエーション・運動・遊び等のために利用しますか。

1.利用しない

2.毎日

3.週に1回

4.月に1回

5.年に数回

次へ

改ページ

質問表示条件

条件式

(Q4 or 2,3,4,5)

Q5

必須

■前問で「利用する」とお答えの方にお伺いします■

非公式緑地をどのように利用されますか。  
(ご自由にお書きください)

(文字数制限なし)

次へ

改ページ

質問表示条件

条件式

(Q4 or 2,3,4,5)

Q6

必須

公園・庭ではなく非公式緑地を使う場合、それはなぜですか。  
(いくつでも)

1.家に近い

2.野性的でワクワクする

3.人が多すぎない

4.動植物が多い・種類が違う

5.人目を避けられる

6.利用制限がない（犬・ボール投げ禁止等）

7.色々なことに使える（庭造り等）

8.家の近くにいい公園がない

9.庭等の緑地を持っていない

10.その他

次へ

改ページ

質問表示条件

条件式

(Q4 or 2,3,4,5)

Q7

必須

非公式緑地を利用して、問題がありましたか。  
(いくつでも)

- ☐

1.とくにない(排他)
- ☐

2.入り難かった（塀・禁止標識等）
- ☐

3.使うのが怖かった
- ☐

4.危険な動物がいた
- ☐

5.危険な植物があった
- ☐

6.ケガをする危険があった
- ☐

7.ゴミが多い
- ☐

8.所有者との対立
- ☐

9.警察との対立
- ☐

10.他の利用者との対立
- ☐

11.犯罪者が緑地にいた
- ☐

12.麻薬利用者が緑地にいた
- ☐

13.売春婦が緑地にいた
- ☐

14.その他

次へ

改ページ

質問表示条件

条件式

(Q1 or 2,3,4)

Q8

必須

非公式緑地をもっと利用しやすくするためのアイデアはありますか。  
(ご自由にお書きください)

(文字数制限なし)

次へ

改ページ

|                       |   | 1.<br>とても<br>そう<br>思う | 2.<br>そう<br>思う        | 3.<br>どちら<br>とも<br>言え<br>ない | 4.<br>あ<br>ま<br>り<br>思<br>わ<br>な<br>い | 5.<br>全<br>く<br>思<br>わ<br>な<br>い |
|-----------------------|---|-----------------------|-----------------------|-----------------------------|---------------------------------------|----------------------------------|
| 1. 草・木・花がきれい          | ➡ | <input type="radio"/> | <input type="radio"/> | <input type="radio"/>       | <input type="radio"/>                 | <input type="radio"/>            |
| 2. 野生動物が棲息できる         | ➡ | <input type="radio"/> | <input type="radio"/> | <input type="radio"/>       | <input type="radio"/>                 | <input type="radio"/>            |
| 3. 近所が面白くなる           | ➡ | <input type="radio"/> | <input type="radio"/> | <input type="radio"/>       | <input type="radio"/>                 | <input type="radio"/>            |
| 4. レジャー活動等に使える        | ➡ | <input type="radio"/> | <input type="radio"/> | <input type="radio"/>       | <input type="radio"/>                 | <input type="radio"/>            |
| 5. 植物が空気をきれいにする、酸素を作る | ➡ | <input type="radio"/> | <input type="radio"/> | <input type="radio"/>       | <input type="radio"/>                 | <input type="radio"/>            |
| 6. 自然体験できる場所          | ➡ | <input type="radio"/> | <input type="radio"/> | <input type="radio"/>       | <input type="radio"/>                 | <input type="radio"/>            |
| 7. くつろぐ場所として使える       | ➡ | <input type="radio"/> | <input type="radio"/> | <input type="radio"/>       | <input type="radio"/>                 | <input type="radio"/>            |
| 8. 都会を抜け出せる場所         | ➡ | <input type="radio"/> | <input type="radio"/> | <input type="radio"/>       | <input type="radio"/>                 | <input type="radio"/>            |
| 9. 食用植物を育てられる         | ➡ | <input type="radio"/> | <input type="radio"/> | <input type="radio"/>       | <input type="radio"/>                 | <input type="radio"/>            |
|                       |   | 1.<br>とても<br>そう<br>思う | 2.<br>そう<br>思う        | 3.<br>どちら<br>とも<br>言え<br>ない | 4.<br>あ<br>ま<br>り<br>思<br>わ<br>な<br>い | 5.<br>全<br>く<br>思<br>わ<br>な<br>い |
| 10. 食べられる野草が見つかる      | ➡ | <input type="radio"/> | <input type="radio"/> | <input type="radio"/>       | <input type="radio"/>                 | <input type="radio"/>            |
| 11. 子どもが遊びに使える        | ➡ | <input type="radio"/> | <input type="radio"/> | <input type="radio"/>       | <input type="radio"/>                 | <input type="radio"/>            |
| 12. 子どもが都会で自然を体験できる   | ➡ | <input type="radio"/> | <input type="radio"/> | <input type="radio"/>       | <input type="radio"/>                 | <input type="radio"/>            |
| 13. 緑地が都市を涼しくする       | ➡ | <input type="radio"/> | <input type="radio"/> | <input type="radio"/>       | <input type="radio"/>                 | <input type="radio"/>            |
| 14. 植物が炭素捕捉して温暖化を抑制する | ➡ | <input type="radio"/> | <input type="radio"/> | <input type="radio"/>       | <input type="radio"/>                 | <input type="radio"/>            |
| 15. 動植物が都市の生物多様性を増やす  | ➡ | <input type="radio"/> | <input type="radio"/> | <input type="radio"/>       | <input type="radio"/>                 | <input type="radio"/>            |
| 16. 鳥・野生動物等を観察できるいい機会 | ➡ | <input type="radio"/> | <input type="radio"/> | <input type="radio"/>       | <input type="radio"/>                 | <input type="radio"/>            |
| 17. 町に少しでも緑があったほうがいい  | ➡ | <input type="radio"/> | <input type="radio"/> | <input type="radio"/>       | <input type="radio"/>                 | <input type="radio"/>            |

次へ

Q10

必須

非公式緑地にはどのような問題がありうると思いますか。  
(矢印方向にそれぞれひとつだけ)

|                         |   | 1.<br>とてもそう思う         | 2.<br>そう思う            | 3.<br>どちらとも言えない       | 4.<br>あまり思わない         | 5.<br>全く思わない          |
|-------------------------|---|-----------------------|-----------------------|-----------------------|-----------------------|-----------------------|
| 1. 場所の無駄遣い（道路・家等を開発すべき） | ➡ | <input type="radio"/> |
| 2. ゴミのポイ捨て              | ➡ | <input type="radio"/> |
| 3. 破壊行為                 | ➡ | <input type="radio"/> |
| 4. 落書き                  | ➡ | <input type="radio"/> |
| 5. 子どもや若者がうるさい          | ➡ | <input type="radio"/> |
| 6. 犯罪者が使うかもしれない         | ➡ | <input type="radio"/> |
| 7. 汚く、乱雑に見える            | ➡ | <input type="radio"/> |
|                         |   | 1.<br>とてもそう思う         | 2.<br>そう思う            | 3.<br>どちらとも言えない       | 4.<br>あまり思わない         | 5.<br>全く思わない          |
| 8. 子どもに危ない              | ➡ | <input type="radio"/> |
| 9. 害虫・害獣の繁殖地            | ➡ | <input type="radio"/> |
| 10. 雑草だらけ               | ➡ | <input type="radio"/> |
| 11. 不審者を引き寄せる           | ➡ | <input type="radio"/> |
| 12. 火災の危険を生む            | ➡ | <input type="radio"/> |
| 13. 責任問題（損害賠償等）         | ➡ | <input type="radio"/> |

次へ

改ページ

Q11

必須

一般的に、非公式緑地はあなたの日常生活をよくすると思いますか、悪くすると思いますか。

- ☐ 1.よくする
- ☐ 2.悪くする
- ☐ 3.両方
- ☐ 4.どちらでもない

Q12

必須

上記について、なぜそう答えましたか。  
(ご自由にお書きください)

(文字数制限なし)

次へ

改ページ

Q13

必須

一般的に、十分に広い非公式緑地をどのような利用目的のために管理するべきですか。  
(矢印方向にそれぞれひとつだけ)

|                            |   | 1.<br>とても<br>そう思う     | 2.<br>そう<br>思う        | 3.<br>どちら<br>とも言<br>えない | 4.<br>あまり<br>思わな<br>い | 5.<br>全く<br>思わな<br>い  |
|----------------------------|---|-----------------------|-----------------------|-------------------------|-----------------------|-----------------------|
| 1. 管理する必要はない、そのままにするべきだ    | ➡ | <input type="radio"/> | <input type="radio"/> | <input type="radio"/>   | <input type="radio"/> | <input type="radio"/> |
| 2. 都市農業・市民農園・菜園など          | ➡ | <input type="radio"/> | <input type="radio"/> | <input type="radio"/>   | <input type="radio"/> | <input type="radio"/> |
| 3. 環境美化（花壇・芝生など）           | ➡ | <input type="radio"/> | <input type="radio"/> | <input type="radio"/>   | <input type="radio"/> | <input type="radio"/> |
| 4. 子供の非公式的なレクリエーション・運動・遊び場 | ➡ | <input type="radio"/> | <input type="radio"/> | <input type="radio"/>   | <input type="radio"/> | <input type="radio"/> |
| 5. 大人の非公式的なレクリエーション・運動・遊び場 | ➡ | <input type="radio"/> | <input type="radio"/> | <input type="radio"/>   | <input type="radio"/> | <input type="radio"/> |
| 6. 公式緑地（ミニ公園等）に変える         | ➡ | <input type="radio"/> | <input type="radio"/> | <input type="radio"/>   | <input type="radio"/> | <input type="radio"/> |
| 7. 動物のための自然保護              | ➡ | <input type="radio"/> | <input type="radio"/> | <input type="radio"/>   | <input type="radio"/> | <input type="radio"/> |
| 8. 植物のための自然保護              | ➡ | <input type="radio"/> | <input type="radio"/> | <input type="radio"/>   | <input type="radio"/> | <input type="radio"/> |
| 9. 再開発                     | ➡ | <input type="radio"/> | <input type="radio"/> | <input type="radio"/>   | <input type="radio"/> | <input type="radio"/> |
| 10. 駐車場                    | ➡ | <input type="radio"/> | <input type="radio"/> | <input type="radio"/>   | <input type="radio"/> | <input type="radio"/> |

Q14

必須

他にも考えつく利用目的があれば、教えてください。  
(ご自由にお書きください)

(文字数制限なし)

次へ

改ページ

Q15

必須

非公式緑地をどのように管理するべきですか。あなたのお考えに近いものをお選びください。  
(それぞれひとつだけ)

| A                                          | Aに強く賛成する              | Aにやや賛成する              | どちらとも言えない             | Bにやや賛成する              | Bに強く賛成する              | B                                             |
|--------------------------------------------|-----------------------|-----------------------|-----------------------|-----------------------|-----------------------|-----------------------------------------------|
| A-1. 非公式緑地の管理は地主以外の人には関係ないこと               | <input type="radio"/> | B-1. 非公式緑地の管理は近所の住民にも関係あること                   |
| A-2. 一般的に、非公式緑地の管理は主に市政がするべきだ              | <input type="radio"/> | B-2. 一般的に、非公式緑地の管理は主に近所の住民がするべきだ              |
| A-3. 近所の非公式緑地をどのように管理すればいいのは、行政が一番よくわかっている | <input type="radio"/> | B-3. 近所の非公式緑地をどのように管理すればいいのは、近所の住民が一番よくわかっている |
| A-4. 非公式緑地の管理方法管理は厳格な規則の上で行うべきだ            | <input type="radio"/> | B-4. 非公式緑地の管理方法管理は状況に応じて非公式的で行うべきだ            |
| A-5. 非公式緑地の利用許可近所の住民は非公式緑地を勝手に利用できるべきではない  | <input type="radio"/> | B-5. 非公式緑地の利用許可近所の住民は非公式緑地を勝手に利用できるべきだ        |
| A-6. 非公式緑地の損害賠償責任非公式緑地の利用者が責任を持つべきだ        | <input type="radio"/> | B-6. 非公式緑地の損害賠償責任非公式緑地の地主が責任を持つべきだ            |
| A-7. 住民が非公式緑地を管理すれば、外観・風景が今より悪くなる          | <input type="radio"/> | B-7. 住民が非公式緑地を管理すれば、外観・風景が今より良くなる             |
| A-8. 住民が非公式緑地を管理するならば、行政から助成金をもらう必要がない     | <input type="radio"/> | B-8. 住民が非公式緑地を管理するならば、行政から助成金をもらう必要がある        |
| A-9. 住民が非公式緑地を管理するならば、行政から訓練などの支援をもらう必要がない | <input type="radio"/> | B-9. 住民が非公式緑地を管理するならば、行政から訓練などの支援をもらう必要がある    |
| A-10. 非公式緑地を利用できれば、使える期間は一時的で良い            | <input type="radio"/> | B-10. 非公式緑地を利用できれば、使える期間は長期的の方が良い             |



Q16

必須

非公式緑地の管理について、ご意見があれば自由にお書きください。

(文字数制限なし)

次へ

改ページ

Q17

必須

近所の非公式緑地の管理に参加したいですか。  
(矢印方向にそれぞれひとつだけ)

|                         |   | 1.<br>とても<br>そう<br>思う | 2.<br>そう<br>思う        | 3.<br>どちら<br>とも<br>言え<br>ない | 4.<br>あ<br>ま<br>り<br>思<br>わ<br>な<br>い | 5.<br>全<br>く<br>思<br>わ<br>な<br>い |
|-------------------------|---|-----------------------|-----------------------|-----------------------------|---------------------------------------|----------------------------------|
| 1. 時間や能力をささげて、管理を支援したい  | ➡ | <input type="radio"/> | <input type="radio"/> | <input type="radio"/>       | <input type="radio"/>                 | <input type="radio"/>            |
| 2. 寄付金など金銭によって管理を支援したい  | ➡ | <input type="radio"/> | <input type="radio"/> | <input type="radio"/>       | <input type="radio"/>                 | <input type="radio"/>            |
| 3. 月に1時間以上を管理活動したい      | ➡ | <input type="radio"/> | <input type="radio"/> | <input type="radio"/>       | <input type="radio"/>                 | <input type="radio"/>            |
| 4. 週に1時間以上を管理活動したい      | ➡ | <input type="radio"/> | <input type="radio"/> | <input type="radio"/>       | <input type="radio"/>                 | <input type="radio"/>            |
| 5. 活動運営やリーダーをやってみたい     | ➡ | <input type="radio"/> | <input type="radio"/> | <input type="radio"/>       | <input type="radio"/>                 | <input type="radio"/>            |
| 6. ゴミ拾いをしたい             | ➡ | <input type="radio"/> | <input type="radio"/> | <input type="radio"/>       | <input type="radio"/>                 | <input type="radio"/>            |
| 7. 草切り・草むしりをしたい         | ➡ | <input type="radio"/> | <input type="radio"/> | <input type="radio"/>       | <input type="radio"/>                 | <input type="radio"/>            |
| 8. 花や木を植えたい             | ➡ | <input type="radio"/> | <input type="radio"/> | <input type="radio"/>       | <input type="radio"/>                 | <input type="radio"/>            |
| 9. ベンチや遊び道具を作りたい        | ➡ | <input type="radio"/> | <input type="radio"/> | <input type="radio"/>       | <input type="radio"/>                 | <input type="radio"/>            |
| 10. 研究調査（生物多様性など）に協力したい | ➡ | <input type="radio"/> | <input type="radio"/> | <input type="radio"/>       | <input type="radio"/>                 | <input type="radio"/>            |

Q18

必須

他に、住民が非公式緑地の管理にどのように参加できるか、方法などについてのご意見を教えてください。  
(ご自由にお書きください)

(文字数制限なし)

次へ

改ページ



Q19

必須

都市の自然についてのご意見を教えてください。  
(矢印方向にそれぞれひとつだけ)

|                                                            |   | 1.<br>とても<br>そう<br>思う | 2.<br>そう<br>思う        | 3.<br>ど<br>ち<br>ら<br>と<br>も<br>言<br>え<br>な<br>い | 4.<br>あ<br>ま<br>り<br>思<br>わ<br>な<br>い | 5.<br>全<br>く<br>思<br>わ<br>な<br>い |
|------------------------------------------------------------|---|-----------------------|-----------------------|-------------------------------------------------|---------------------------------------|----------------------------------|
| 1. 近所の緑地を大切に思っている                                          | ➡ | <input type="radio"/> | <input type="radio"/> | <input type="radio"/>                           | <input type="radio"/>                 | <input type="radio"/>            |
| 2. 都市の自然は、人間が考える価値に関わらず、価値があるものだ                           | ➡ | <input type="radio"/> | <input type="radio"/> | <input type="radio"/>                           | <input type="radio"/>                 | <input type="radio"/>            |
| 3. 都市の自然を次世代のために保存する責任がある                                  | ➡ | <input type="radio"/> | <input type="radio"/> | <input type="radio"/>                           | <input type="radio"/>                 | <input type="radio"/>            |
| 4. 都市の自然保存のためにお金を寄付する気がある                                  | ➡ | <input type="radio"/> | <input type="radio"/> | <input type="radio"/>                           | <input type="radio"/>                 | <input type="radio"/>            |
| 5. 都市の動物と植物は人間と同じ生存権がある                                    | ➡ | <input type="radio"/> | <input type="radio"/> | <input type="radio"/>                           | <input type="radio"/>                 | <input type="radio"/>            |
| 6. 都市が人口減少で小さくなる時は、<br>何としてでも成長を目指すべきだ                     | ➡ | <input type="radio"/> | <input type="radio"/> | <input type="radio"/>                           | <input type="radio"/>                 | <input type="radio"/>            |
| 7. 都市が人口減少で小さくなる時は、<br>その土地を使って家やアパートをより大きく作るべきだ           | ➡ | <input type="radio"/> | <input type="radio"/> | <input type="radio"/>                           | <input type="radio"/>                 | <input type="radio"/>            |
| 8. 都市が人口減少で小さくなる時は、<br>その土地を使ってレクリエーション・運動・遊びのために緑地を増やすべきだ | ➡ | <input type="radio"/> | <input type="radio"/> | <input type="radio"/>                           | <input type="radio"/>                 | <input type="radio"/>            |
| 9. 都市が人口減少で小さくなる時は、<br>その土地を使って都市農業・市民農園などを増やすべきだ          | ➡ | <input type="radio"/> | <input type="radio"/> | <input type="radio"/>                           | <input type="radio"/>                 | <input type="radio"/>            |
| 10. 都市が人口減少で小さくなる時は、その土地を自然に返すべきだ                          | ➡ | <input type="radio"/> | <input type="radio"/> | <input type="radio"/>                           | <input type="radio"/>                 | <input type="radio"/>            |

次へ

改ページ

■あなたご自身についてお伺いします。

Q20

必須

どのような家に住んでいますか。

- ☐ 1.庭がある住宅（一戸建て・連続建て等）
- ☐ 2.庭がない住宅（一戸建て・連続建て等）
- ☐ 3.共同緑地があるアパート・マンション等
- ☐ 4.共同緑地がないアパート・マンション等
- ☐ 5.その他

次へ

改ページ

Q21

必須

今の都市に何年間住んでおられますか。  
(半角数字でご記入ください)

※半年未満の場合は0、半年から1年間の場合は1と書いてください。

テキストボックス1

年

【必須】(数字のみ(小数不可))(制限あり:0以上99以内)

次へ

改ページ

Q22

必須

最終学歴を教えてください。

- ☐ 1.中卒
- ☐ 2.高卒
- ☐ 3.大学卒（学士・短大卒・専門大卒等）
- ☐ 4.大学院卒（修士・博士等）
- ☐ 5.上記以外

次へ

改ページ

Q23

必須

年間世帯収入はどれくらいですか。

- ☐ 200万円未満
- ☐ 200万円～400万円未満
- ☐ 400万円～600万円未満
- ☐ 600万円～800万円未満
- ☐ 800万円～1,000万円未満
- ☐ 1,000万円～1,250万円未満
- ☐ 1,250万円以上
- ☐ わからない・答えたくない

次へ

改ページ

Q24

必須

お住まいの郵便番号を教えてください。

郵便番号

必須

(例) 000

-

(例) 0000

<半角数字>

次へ

改ページ

アンケートにご回答いただき、ありがとうございました。

【あなたご自身に関するアンケート】の獲得ポイント

〇〇ポイント

閉じる
